# Supplementary material
Source: Frontiers journal article supplement (https://www.frontiersin.org/articles/120817)
Supplement: Image_1.PDF [file Image_1.PDF]

## Supplementary Figure

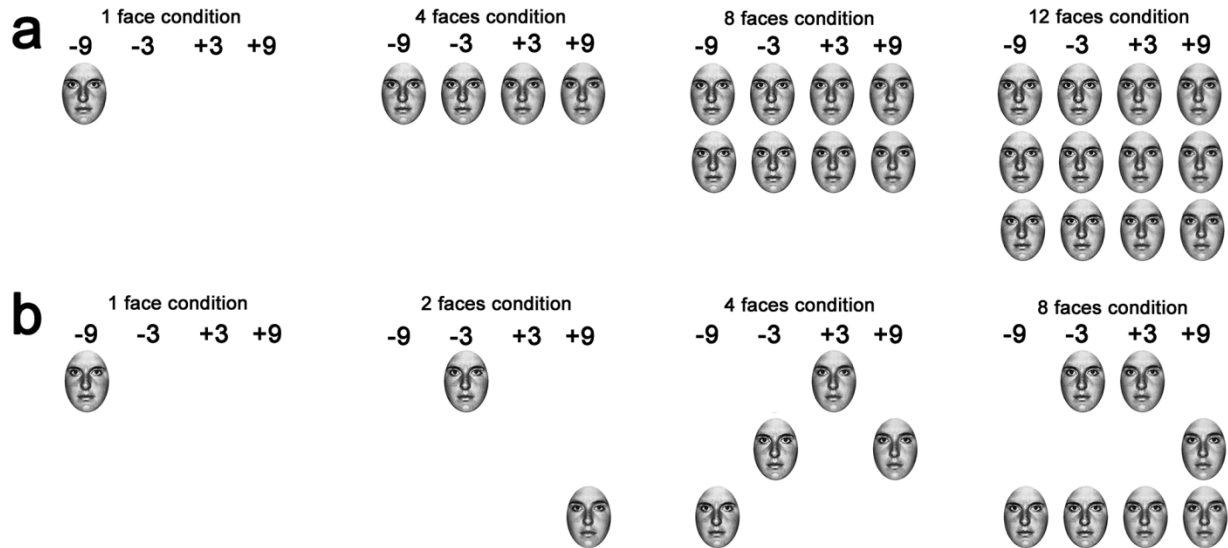

Supplementary Figure. Display examples for Experiments 2a & 2b. (a) Each display contained either a single face or 4 identities, each repeating 1, 2, or 3 times. The four faces in the 4, 8, and 12 face conditions were 3 and 9 steps away from the mean face in either direction, with a consistent variance. (b) Each display contained 1, 2, 4, or 8 faces randomly selected from 12 faces. Thus, the variance of the displayed faces was not restricted. Note: all the faces were randomly picked and randomly displayed on the screen.
